# Supplementary material for: Isolation and characterization of NY-ESO-1–specific T cell receptors restricted on various MHC molecules
Source: PubMed Central journal article supplement — Proc Natl Acad Sci U S A. 2018 Oct 22;115(45):E10702–11. doi: 10.1073/pnas.1810653115 (PMC6233129; doi:10.1073/pnas.1810653115), 2018-10-22
Supplement: pnas.1810653115.sapp.pdf [file pnas.1810653115.sapp.pdf]

## Supplemental Figures

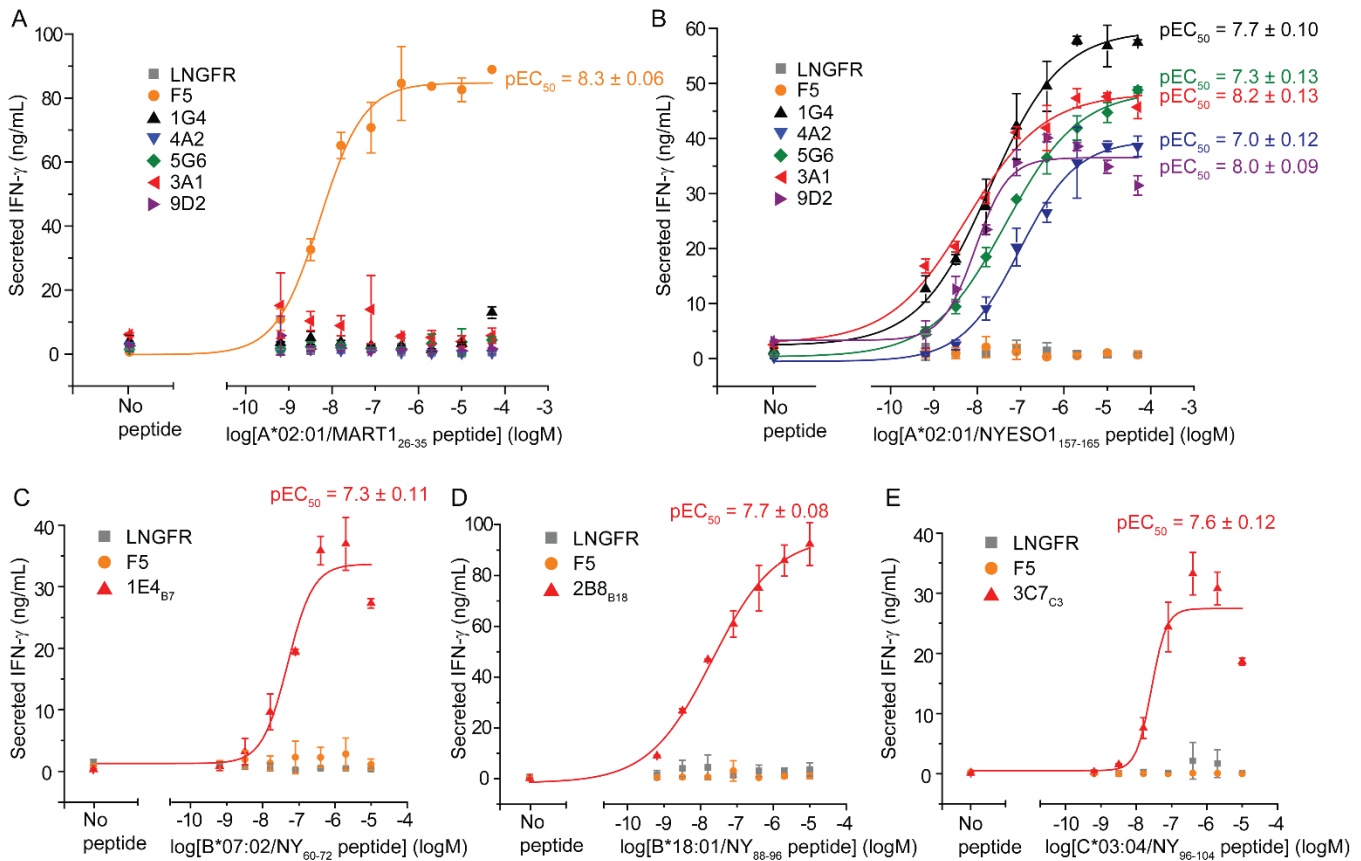

### Supplemental Figure S1.

#### Determination of EC<sub>50</sub> for NY-ESO-1-specific TCRs.

(A and B) ELISA measuring secretion of IFN- $\gamma$  from TCR-transduced PBMCs following 48 hours coincubation with K562 engineered to express HLA-A\*02:01 and pulsed with varied concentrations of (A) MART<sub>26-35</sub> or (B) NY<sub>157-165</sub> peptide. (C-E) ELISA measuring secretion of IFN- $\gamma$  from TCR-transduced PBMCs following 48 hours coincubation with K562 engineered to express (C) HLA-B\*07:02, (D) HLA-B\*18:01, or (E) HLA-C\*03:04 and pulsed with varied concentrations of indicated peptides. Means  $\pm$  SD for two technical replicates are shown. EC<sub>50</sub> values and associated errors determined by non-linear curve fitting are indicated.

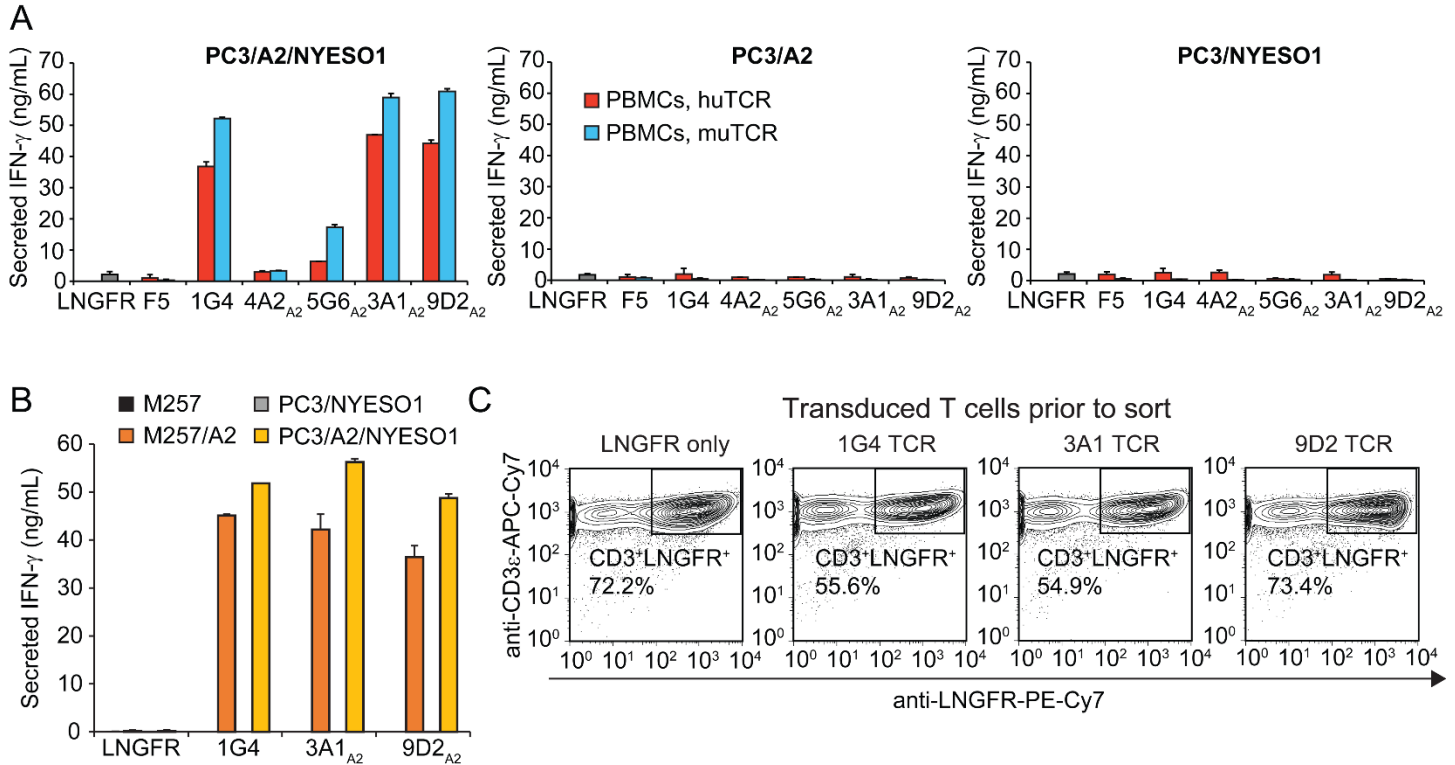

### Supplemental Figure S2.

#### Establishment of xenograft tumor line and function of input T cells for *in vivo* experiment.

(A) ELISA measuring secretion of IFN- $\gamma$  from TCR-transduced PBMCs following 48 hours coincubation with derivatives of the PC-3 prostate cancer cell line engineered to express (left) HLA-A\*02:01 and NY-ESO-1 full protein, (middle) HLA-A\*02:01 alone, or (right) NY-ESO-1 full protein alone. Means  $\pm$  SD for two technical replicates are shown. (B) ELISA comparing secretion of IFN- $\gamma$  from TCR-transduced PBMCs following 48 hours coincubation with indicated M257 or PC-3 target cells. On the 4<sup>th</sup> day post-transduction, TCR-transduced PBMCs were sorted for CD3<sup>+</sup>/LNGFR<sup>+</sup> and then expanded for 13 additional days prior to the co-culture/ELISA assay and the *in vivo* experiment. Means  $\pm$  SD for a representative experiment with two technical replicates is shown. (C) Flow cytometry contour plots comparing the transduction (LNGFR<sup>+</sup>) levels of TCR-transduced PBMCs used for the *in vivo* experiment.
